# Supplementary material for: Can a molecular switch exist in both superalkali electride and superalkalide forms?
Source: Royal Society of Chemistry journal article supplement (doi:10.1039/d1cp05657c), 2022-01-01
Supplement: d1cp05657c1.pdf [file d1cp05657c1.pdf]

Supporting Information

## **Can a molecular switch exist in both superalkali electrider and superalkalide forms?**

Xiu-Guang Yi,<sup>a</sup> Yin-Feng Wang,<sup>\*a</sup> Hua-Rong Zhang,<sup>\*b</sup> Jin-Hua Cai,<sup>a</sup> Xue-Xia Liu,<sup>a</sup> Jia Li,<sup>a</sup> Zhi-Jun Wang,<sup>a</sup> Fu-Quan Bai,<sup>\*c</sup> and Zhi-Ru Li<sup>\*c</sup>

---

<sup>a</sup> Jiangxi Province Key Laboratory of Coordination Chemistry, School of Chemistry and Chemical Engineering, Jinggangshan University, Ji'an, Jiangxi 343009 (P.R. China). E-mail: [cyclont@yeah.net](mailto:cyclont@yeah.net)

<sup>b</sup> Key Laboratory of Organosilicon Chemistry and Material Technology, Hangzhou Normal University, Hangzhou, Zhejiang 311121 (P.R. China). E-mail: [zhanghuaxy99@hznu.edu.cn](mailto:zhanghuaxy99@hznu.edu.cn).

<sup>c</sup> Institute of Theoretical Chemistry, Jilin University, Changchun 130023 (P.R. China) E-mail: [baifq@jlu.edu.cn](mailto:baifq@jlu.edu.cn); [lzr@jlu.edu.cn](mailto:lzr@jlu.edu.cn)

## Contents

|                                                                                                                                                                                                                                                                                                    |     |
|----------------------------------------------------------------------------------------------------------------------------------------------------------------------------------------------------------------------------------------------------------------------------------------------------|-----|
| Optimized Cartesian coordinates for parallel and T-shaped as well as the transition states M-PHY (M = Li, Na, and K) at the MP2/6-311+G(d,p) level.....                                                                                                                                            | S3  |
| <b>Table S1.</b> Differences of mainly absorption wavelengths between M06-2X and B3YP results for both parallel and T-shaped Li <sub>3</sub> -PHY .....                                                                                                                                            | S7  |
| <b>Table S2.</b> NBO charges of the parallel and T-shaped M-PHY (in Å) at the MP2/6-311+G (2d, p) level.....                                                                                                                                                                                       | S8  |
| <b>Table S3.</b> Relative energies of different excited states of the e <sup>-</sup> ...M <sub>3</sub> <sup>+</sup> -PHY and M <sup>δ-</sup> -M <sub>2</sub> <sup>(1-δ)+</sup> -PHY (M = Li, Na, and K) as well as the corresponding transition states at the TD-M06-2X/6-311++G(2d, p) level..... | S9  |
| <b>Fig. S1.</b> HOMO (isovalue of 0.02 au) and ELF maps of e <sup>-</sup> ...M <sub>3</sub> <sup>+</sup> -PHY at different methods with 6-311++G(2d, p) basis set.....                                                                                                                             | S10 |
| <b>Fig. S2.</b> HOMO (isovalue of 0.02 au) and ELF maps of M <sup>δ-</sup> -M <sub>2</sub> <sup>(1-δ)+</sup> -PHY at different methods with 6-311++G(2d, p) basis set.....                                                                                                                         | S11 |
| <b>Fig. S3.</b> Electronic absorption spectra and crucial excited states of both parallel and T-shaped Li-PHY (isovalue of 0.02 au).a)for e <sup>-</sup> ...Li <sub>3</sub> <sup>+</sup> -PHY and b) for Li <sup>δ-</sup> -Li <sub>2</sub> <sup>(1-δ)+</sup> -PHY.....                             | S12 |
| <b>Fig. S4.</b> Electronic absorption spectra and crucial excited states of both parallel and T-shaped Li-PHY (isovalue of 0.02 au).a)for e <sup>-</sup> ...Na <sub>3</sub> <sup>+</sup> -PHY and b) for Na <sup>δ-</sup> -Na <sub>2</sub> <sup>(1-δ)+</sup> -PHY.....                             | S13 |
| <b>Fig. S5.</b> Electronic absorption spectra and crucial excited states of both parallel and T-shaped Li-PHY (isovalue of 0.02 au).a)for e <sup>-</sup> ...K <sub>3</sub> <sup>+</sup> -PHY and b) for K <sup>δ-</sup> -K <sub>2</sub> <sup>(1-δ)+</sup> -PHY.....                                | S14 |

Optimized Cartesian coordinates at the MP2/6-311+G(d,p) level.

Parallel Li<sub>3</sub>-PHY

|    |             |             |             |
|----|-------------|-------------|-------------|
| C  | -2.42916897 | -0.44412401 | -0.17850895 |
| C  | -1.35563762 | 0.49414222  | -0.21265174 |
| C  | -1.57485904 | 1.90299566  | -0.17917239 |
| C  | -2.17151969 | -1.82096088 | -0.19015021 |
| C  | -0.00037922 | 0.00083333  | -0.30079319 |
| C  | 0.25005068  | -1.41977223 | -0.21460187 |
| C  | -0.86043908 | -2.31403515 | -0.18318108 |
| C  | 1.59937182  | -1.88039642 | -0.18296193 |
| H  | 1.78984114  | -2.95079479 | -0.16581931 |
| C  | 2.66284203  | -0.96876477 | -0.19075683 |
| C  | 2.43421064  | 0.41317884  | -0.17950756 |
| C  | 1.10458126  | 0.92783713  | -0.21317695 |
| C  | 0.82889533  | 2.32674498  | -0.18038672 |
| C  | -0.49234646 | 2.79197469  | -0.18842945 |
| H  | -0.68132248 | 3.86393865  | -0.18539674 |
| H  | 1.66063764  | 3.02682451  | -0.16106744 |
| H  | -3.00545574 | -2.52055005 | -0.18797181 |
| H  | -0.67342568 | -3.38504000 | -0.16610554 |
| H  | 3.68572349  | -1.34106477 | -0.18888638 |
| H  | 3.26819059  | 1.11060408  | -0.15993409 |
| H  | -2.59582715 | 2.27648003  | -0.15900954 |
| H  | -3.45132523 | -0.07388601 | -0.15814020 |
| Li | -1.31198763 | -1.10957575 | 1.90115063  |
| Li | 1.61638814  | -0.59387421 | 1.90362927  |
| Li | -0.29461605 | 1.68197261  | 1.89455489  |

T-shaped Li<sub>3</sub>-PHY

|   |             |             |             |
|---|-------------|-------------|-------------|
| C | 1.25205490  | -2.02957823 | -0.43214982 |
| C | -0.00030333 | -1.34603733 | -0.39582445 |
| C | -1.25300045 | -2.02897239 | -0.43211859 |
| C | 2.46089990  | -1.31324783 | -0.39190519 |
| C | 0.00004610  | 0.09669429  | -0.25863650 |
| C | 1.25177439  | 0.81907382  | -0.19131772 |
| C | 2.47902766  | 0.07626583  | -0.23651858 |
| C | 1.21624946  | 2.22716391  | -0.06043030 |
| H | 2.15654167  | 2.77276740  | -0.02013482 |
| C | 0.00073314  | 2.91025998  | -0.01273918 |
| C | -1.21511575 | 2.22775471  | -0.06046628 |
| C | -1.25132660 | 0.81968662  | -0.19133371 |
| C | -2.47894477 | 0.07748991  | -0.23661851 |
| C | -2.46148698 | -1.31203540 | -0.39200569 |
| H | -3.40310577 | -1.85530435 | -0.44716612 |

|    |             |             |             |
|----|-------------|-------------|-------------|
| H  | -3.42175694 | 0.61779884  | -0.20040119 |
| H  | 3.40225070  | -1.85698471 | -0.44698751 |
| H  | 3.42210028  | 0.61610975  | -0.20017235 |
| H  | 0.00099527  | 3.99444553  | 0.07782798  |
| H  | -2.15514380 | 2.77381505  | -0.02018818 |
| H  | -1.25838315 | -3.11110690 | -0.53311481 |
| H  | 1.25690787  | -3.11171580 | -0.53313482 |
| Li | 1.43320577  | -0.86824835 | 1.58189353  |
| Li | -1.43441560 | -0.86766236 | 1.58226902  |
| Li | -0.00014090 | -0.99306659 | 4.19445719  |

TS between Parallel and T-shaped Li<sub>3</sub>-PHY

|    |             |             |             |
|----|-------------|-------------|-------------|
| C  | 1.25138819  | -2.13408833 | -0.13896202 |
| C  | 0.00003700  | -1.44906822 | -0.18458302 |
| C  | -1.25127720 | -2.13415832 | -0.13895402 |
| C  | 2.45942538  | -1.41934822 | -0.19125702 |
| C  | -0.00000300 | -0.00523400 | -0.28799104 |
| C  | 1.24952520  | 0.71852811  | -0.24529304 |
| C  | 2.47504238  | -0.02109100 | -0.22254804 |
| C  | 1.21755618  | 2.13668832  | -0.24446804 |
| H  | 2.15841232  | 2.68291741  | -0.23871204 |
| C  | -0.00008100 | 2.82273842  | -0.23585504 |
| C  | -1.21767918 | 2.13662232  | -0.24446804 |
| C  | -1.24957018 | 0.71846111  | -0.24528904 |
| C  | -2.47504638 | -0.02122600 | -0.22253704 |
| C  | -2.45935438 | -1.41948322 | -0.19124102 |
| H  | -3.40127552 | -1.96508130 | -0.18747202 |
| H  | -3.41754152 | 0.52068108  | -0.23852404 |
| H  | 3.40137552  | -1.96489630 | -0.18750002 |
| H  | 3.41750752  | 0.52086708  | -0.23854204 |
| H  | -0.00010900 | 3.91127560  | -0.24856604 |
| H  | -2.15856532 | 2.68279942  | -0.23871104 |
| H  | -1.25530718 | -3.22048350 | -0.09457702 |
| H  | 1.25547620  | -3.22041349 | -0.09459202 |
| Li | 1.47424922  | -0.75555712 | 1.77927727  |
| Li | -1.47415222 | -0.75562212 | 1.77925927  |
| Li | -0.00001600 | 1.66994326  | 2.61742140  |

Parallel Na<sub>3</sub>-PHY

|   |             |             |             |
|---|-------------|-------------|-------------|
| C | -2.44147151 | -0.37050968 | -0.71786984 |
| C | -1.34306510 | 0.53642888  | -0.68572298 |
| C | -1.51826013 | 1.95017743  | -0.71424190 |
| C | -2.22423402 | -1.75340526 | -0.73717910 |
| C | -0.00115034 | 0.00266928  | -0.74485209 |

|    |             |             |             |
|----|-------------|-------------|-------------|
| C  | 0.20753278  | -1.42656872 | -0.69180091 |
| C  | -0.92917594 | -2.28501413 | -0.72442665 |
| C  | 1.54217192  | -1.92421035 | -0.72575133 |
| H  | 1.70220922  | -3.00031469 | -0.75373312 |
| C  | 2.63118177  | -1.04455719 | -0.74001396 |
| C  | 2.44402664  | 0.34272599  | -0.72094534 |
| C  | 1.13223419  | 0.89779623  | -0.68734865 |
| C  | 0.89591831  | 2.30262106  | -0.71599951 |
| C  | -0.41039122 | 2.80597597  | -0.72941120 |
| H  | -0.56758421 | 3.88239493  | -0.79078525 |
| H  | 1.74785667  | 2.97935821  | -0.74070248 |
| H  | -3.07786229 | -2.42746202 | -0.80151294 |
| H  | -0.77492041 | -3.36195889 | -0.75251553 |
| H  | 3.64180967  | -1.44646726 | -0.80542557 |
| H  | 3.29959187  | 1.01489136  | -0.74523336 |
| H  | -2.52814092 | 2.35511592  | -0.73759322 |
| H  | -3.45351861 | 0.02900649  | -0.74092533 |
| Na | -1.54874456 | -1.23243073 | 1.90517164  |
| Na | 1.84035598  | -0.73777849 | 1.90458627  |
| Na | -0.28264280 | 1.94936002  | 1.90677007  |

T-shaped Na<sub>3</sub>-PHY

|   |             |             |             |
|---|-------------|-------------|-------------|
| C | 0.02348614  | -1.25087626 | 2.15031641  |
| C | -0.25328258 | 0.00019581  | 1.52449460  |
| C | 0.02302997  | 1.25150661  | 2.14993116  |
| C | -0.35213016 | -2.45668119 | 1.53824987  |
| C | -0.94145933 | 0.00005795  | 0.25085897  |
| C | -1.22591101 | -1.25159596 | -0.41655605 |
| C | -0.96943985 | -2.47511086 | 0.28340956  |
| C | -1.85043416 | -1.21606795 | -1.68831379 |
| H | -2.08633775 | -2.15647711 | -2.18287167 |
| C | -2.12587577 | -0.00070378 | -2.31673204 |
| C | -1.85102101 | 1.21510152  | -1.68888514 |
| C | -1.22633025 | 1.25136516  | -0.41719737 |
| C | -0.97007140 | 2.47507914  | 0.28258790  |
| C | -0.35280381 | 2.45702133  | 1.53745997  |
| H | -0.18520875 | 3.39578421  | 2.06448663  |
| H | -1.27172981 | 3.41610574  | -0.17354813 |
| H | -0.18422637 | -3.39538696 | 2.06527806  |
| H | -1.27103413 | -3.41617923 | -0.17269615 |
| H | -2.60267642 | -0.00096508 | -3.29506436 |
| H | -2.08729378 | 2.15529561  | -2.18368405 |
| H | 0.49249263  | 1.25663803  | 3.13129506  |
| H | 0.49314542  | -1.25567019 | 3.13157508  |

|    |            |             |             |
|----|------------|-------------|-------------|
| Na | 1.56148336 | -1.69552147 | -0.18300190 |
| Na | 1.56149388 | 1.69582428  | -0.18278825 |
| Na | 4.25305260 | 0.00016136  | -1.59080210 |

TS between Parallel and T-shaped Na<sub>3</sub>-PHY

|    |             |             |             |
|----|-------------|-------------|-------------|
| C  | 1.24296642  | -2.29634600 | 0.05204025  |
| C  | -0.00608851 | -1.64607731 | -0.17306497 |
| C  | -1.25919299 | -2.28787484 | 0.05405189  |
| C  | 2.45044891  | -1.66128061 | -0.27943965 |
| C  | -0.00179305 | -0.32409512 | -0.76348410 |
| C  | 1.25091231  | 0.36084441  | -0.98953697 |
| C  | 2.47084144  | -0.36256237 | -0.79716975 |
| C  | 1.22025575  | 1.68327151  | -1.49984208 |
| H  | 2.16256953  | 2.19033716  | -1.69954898 |
| C  | 0.00603182  | 2.33563629  | -1.72376329 |
| C  | -1.21211564 | 1.69134587  | -1.49781542 |
| C  | -1.25032610 | 0.36910756  | -0.98751831 |
| C  | -2.47505736 | -0.34586689 | -0.79315545 |
| C  | -2.46296188 | -1.64463004 | -0.27539334 |
| H  | -3.40346358 | -2.18148969 | -0.15469744 |
| H  | -3.41472880 | 0.13787961  | -1.05321963 |
| H  | 3.38742453  | -2.20463913 | -0.16033849 |
| H  | 3.41349732  | 0.11448527  | -1.05881667 |
| H  | 0.00911010  | 3.34871245  | -2.12284038 |
| H  | -2.15142117 | 2.20453937  | -1.69598059 |
| H  | -1.26738526 | -3.30557001 | 0.43925397  |
| H  | 1.24490215  | -3.31407814 | 0.43722633  |
| Na | 1.72293233  | -0.13426732 | 1.80905153  |
| Na | -1.71857723 | -0.12237073 | 1.81092105  |
| Na | 0.01164203  | 2.78218245  | 2.29943731  |

Parallel K<sub>3</sub>-PHY

|   |             |             |             |
|---|-------------|-------------|-------------|
| C | -2.42916808 | -0.43710778 | -1.15782622 |
| C | -1.35962176 | 0.50034128  | -1.07450721 |
| C | -1.57323340 | 1.90677356  | -1.15206122 |
| C | -2.17095127 | -1.81077602 | -1.21155422 |
| C | -0.00222457 | 0.00474112  | -1.11985821 |
| C | 0.24766395  | -1.41861858 | -1.08344421 |
| C | -0.86361807 | -2.30639586 | -1.16721122 |
| C | 1.59439173  | -1.87537202 | -1.16914922 |
| H | 1.78320869  | -2.94541464 | -1.23731822 |
| C | 2.65511526  | -0.96474638 | -1.21547022 |
| C | 2.43033184  | 0.41480564  | -1.16189721 |
| C | 1.10560709  | 0.93219964  | -1.07666521 |

|   |             |             |             |
|---|-------------|-------------|-------------|
| C | 0.82826471  | 2.32743416  | -1.15435321 |
| C | -0.49059160 | 2.79123075  | -1.19947522 |
| H | -0.67768572 | 3.85904125  | -1.31433223 |
| H | 1.66077316  | 3.02615593  | -1.21750222 |
| H | -3.00195150 | -2.50620890 | -1.33087123 |
| H | -0.67751614 | -3.37690230 | -1.23546022 |
| H | 3.67295569  | -1.33601399 | -1.33625123 |
| H | 3.26407219  | 1.11206134  | -1.22471122 |
| H | -2.59379565 | 2.28080935  | -1.21358522 |
| H | -3.45059848 | -0.06535693 | -1.21907122 |
| K | -1.80798918 | -1.52369610 | 1.76975400  |
| K | 2.22266902  | -0.81720566 | 1.76689599  |
| K | -0.40474601 | 2.31799501  | 1.77860999  |

T-shaped K<sub>3</sub>-PHY

|   |             |             |             |
|---|-------------|-------------|-------------|
| C | -1.22057809 | 1.25158409  | -2.11633515 |
| C | -1.27920209 | 0.00053800  | -1.43504411 |
| C | -1.21815509 | -1.24927109 | -2.11829615 |
| C | -1.47655811 | 2.44917017  | -1.43489010 |
| C | -1.59215612 | -0.00037300 | -0.02337100 |
| C | -1.67805812 | 1.25100109  | 0.69598505  |
| C | -1.72357313 | 2.46417518  | -0.05951000 |
| C | -1.85972914 | 1.21367909  | 2.10277515  |
| H | -1.94240014 | 2.15309215  | 2.64680119  |
| C | -1.90137714 | -0.00300800 | 2.78683820  |
| C | -1.85741013 | -1.21842409 | 2.10070315  |
| C | -1.67644712 | -1.25327009 | 0.69409705  |
| C | -1.72102612 | -2.46533218 | -0.06348000 |
| C | -1.47364111 | -2.44808718 | -1.43879510 |
| H | -1.51580111 | -3.37976325 | -2.00266114 |
| H | -1.92226114 | -3.40292924 | 0.45264603  |
| H | -1.51993411 | 3.38156324  | -1.99748414 |
| H | -1.92532314 | 3.40080124  | 0.45813003  |
| H | -2.03364914 | -0.00411700 | 3.86727128  |
| H | -1.93869814 | -2.15877116 | 2.64340219  |
| H | -1.04797907 | -1.25268909 | -3.19313523 |
| H | -1.05073208 | 1.25700909  | -3.19124423 |
| K | 1.18092009  | 1.97628814  | -0.14021201 |
| K | 1.18250208  | -1.97428814 | -0.14036601 |
| K | 4.95048535  | 0.00071100  | 0.39490503  |

TS between Parallel and T-shaped K<sub>3</sub>-PHY

|   |             |            |             |
|---|-------------|------------|-------------|
| C | -2.44455002 | 1.25034080 | -1.00218909 |
| C | -1.98157779 | 0.00003019 | -0.49702004 |

|   |             |             |             |
|---|-------------|-------------|-------------|
| C | -2.44478690 | -1.25038237 | -1.00211965 |
| C | -2.11908455 | 2.44875501  | -0.35091375 |
| C | -1.15653984 | -0.00008433 | 0.69076537  |
| C | -0.68848821 | 1.25162784  | 1.24199043  |
| C | -1.27454808 | 2.46440343  | 0.76175731  |
| C | 0.21142519  | 1.21628252  | 2.33795681  |
| H | 0.54999456  | 2.15658566  | 2.76980477  |
| C | 0.67877769  | 0.00021423  | 2.84090755  |
| C | 0.21153941  | -1.21588611 | 2.33789083  |
| C | -0.68856248 | -1.25150632 | 1.24217758  |
| C | -1.27471687 | -2.46436047 | 0.76204704  |
| C | -2.11933170 | -2.44882661 | -0.35067070 |
| H | -2.56566497 | -3.38059224 | -0.69802359 |
| H | -1.03118604 | -3.40114418 | 1.26097591  |
| H | -2.56530332 | 3.38048503  | -0.69851508 |
| H | -1.03108887 | 3.40125931  | 1.26058826  |
| H | 1.36957550  | 0.00020787  | 3.68256592  |
| H | 0.55021596  | -2.15613866 | 2.76976035  |
| H | -3.12780407 | -1.25420901 | -1.84966400 |
| H | -3.12751461 | 1.25421005  | -1.84978491 |
| K | 0.61829772  | 2.00265461  | -1.46112851 |
| K | 0.61776734  | -2.00243561 | -1.46122314 |
| K | 4.10716867  | -0.00044587 | -0.27360550 |



**Table S1.** Differences of mainly absorption wavelengths between M06-2X and B3YP results for both parallel and T-shaped Li<sub>3</sub>-PHY.

|                | parallel   |            | T-shaped   |            |
|----------------|------------|------------|------------|------------|
|                | M06-2X     | B3YP       | M06-2X     | B3YP       |
|                |            |            | 551        | 596        |
|                |            |            | <b>529</b> | <b>514</b> |
| E <sub>1</sub> | <b>667</b> | <b>663</b> | <b>506</b> | <b>508</b> |
|                | <b>665</b> | <b>662</b> |            |            |
| E <sub>2</sub> | <b>503</b> | <b>507</b> | <b>453</b> | <b>462</b> |
| E <sub>3</sub> | 380        | 401        | 385        | 405        |

**Table S2.** NBO charges of the parallel and T-shaped M-PHY (in Å) at the MP2/6-311+G (2d, p) level

|                     | H-shaped                   |                            |                            | T-shaped        |                 |                 |
|---------------------|----------------------------|----------------------------|----------------------------|-----------------|-----------------|-----------------|
|                     | M: Li                      | Na                         | K                          | Li              | Na              | K               |
| M1                  | 0.328                      | 0.330                      | 0.288                      | 0.545           | 0.580           | 0.449           |
| M2                  | 0.328                      | 0.332                      | 0.288                      | 0.545           | 0.580           | 0.449           |
| M3                  | 0.331                      | 0.329                      | 0.288                      | -0.172          | -0.223          | -0.044          |
|                     |                            |                            |                            | <u>-0.110</u>   | <u>-0.149</u>   | <u>-0.208</u>   |
|                     |                            |                            |                            | <i>(-0.089)</i> | <i>(-0.150)</i> | <i>(-0.228)</i> |
| M <sub>3</sub> ring | 0.987                      | 0.991                      | 0.864                      | 0.918           | 0.937           | 0.946           |
|                     | <u>1.014<sup>a</sup></u>   | <u>0.969<sup>a</sup></u>   | <u>1.011<sup>a</sup></u>   | <u>0.914</u>    | <u>0.931</u>    | <u>0.951</u>    |
|                     | <i>(1.005)<sup>b</sup></i> | <i>(0.981)<sup>b</sup></i> | <i>(1.008)<sup>b</sup></i> | <i>(0.917)</i>  | <i>(0.936)</i>  | <i>(1.008)</i>  |
| C4                  | -0.109                     | -0.089                     | -0.066                     | -0.125          | -0.094          | -0.078          |
| C5                  | -0.005                     | 0.001                      | 0.010                      | 0.009           | 0.002           | 0.013           |
| C6                  | -0.005                     | 0.001                      | 0.010                      | -0.010          | -0.013          | -0.013          |
| C7                  | -0.374                     | -0.371                     | -0.362                     | -0.411          | -0.394          | -0.376          |
| C8                  | -0.158                     | -0.148                     | -0.139                     | -0.147          | -0.141          | -0.132          |
| C9                  | -0.375                     | -0.371                     | -0.362                     | -0.395          | -0.391          | -0.383          |
| C10                 | -0.375                     | -0.371                     | -0.362                     | -0.295          | -0.310          | -0.315          |
| C11                 | -0.158                     | -0.148                     | -0.139                     | -0.085          | -0.095          | -0.097          |
| PHY ring            | -0.987                     | -0.991                     | -0.864                     | -0.918          | -0.937          | -0.854          |

<sup>a</sup> Underlined and italic values are at the B3LYP/6-311+G (2d, p) level. <sup>b</sup> italic values in brackets are at the M06-2X/6-311+G (2d, p) level.

**Table S3.** Relative energies of different excited states (in kcal/mol) of the  $e^- \cdots M_3^+$ -PHY and  $M^{\delta-} M_2^{(1-\delta)+}$ -PHY as well as the corresponding transition states at the TD-M06-2X/6-311++G(2d, p) level

|                | $e^- \cdots M_3^+$ -PHY | ETS   | $M^{\delta-} M_2^{(1-\delta)+}$ -PHY |
|----------------|-------------------------|-------|--------------------------------------|
| M = Li         |                         |       |                                      |
|                | 0.00                    | 10.13 | 21.40                                |
|                |                         | 10.49 | 23.82                                |
| E <sub>1</sub> | 17.27                   | 21.28 | 30.39                                |
|                | 17.35                   | 23.93 | 32.37                                |
| E <sub>2</sub> | 31.23                   | 36.63 | 26.04                                |
| E <sub>3</sub> | 49.68                   | 47.86 | 73.91                                |
| M = Na         |                         |       |                                      |
| E <sub>1</sub> | 0.00                    | 7.72  | 9.98                                 |
|                | 0.00                    | 8.90  | 15.54                                |
| E <sub>2</sub> | 23.92                   | 28.31 | 20.50                                |
|                |                         | 34.50 | 34.04                                |
| E <sub>3</sub> | 36.24                   | 36.29 | 35.69                                |
| M = K          |                         |       |                                      |
| E <sub>1</sub> | 0.00                    | 9.35  | 11.53                                |
|                | 0.00                    | 10.56 | 13.95                                |
|                | 15.81                   | 25.09 |                                      |
|                |                         | 27.12 |                                      |
| E <sub>2</sub> | 21.57                   | 21.66 | 18.48                                |
| E <sub>3</sub> | 46.15                   | 46.16 | 45.84                                |
|                | 46.16                   | 48.53 | 47.37                                |

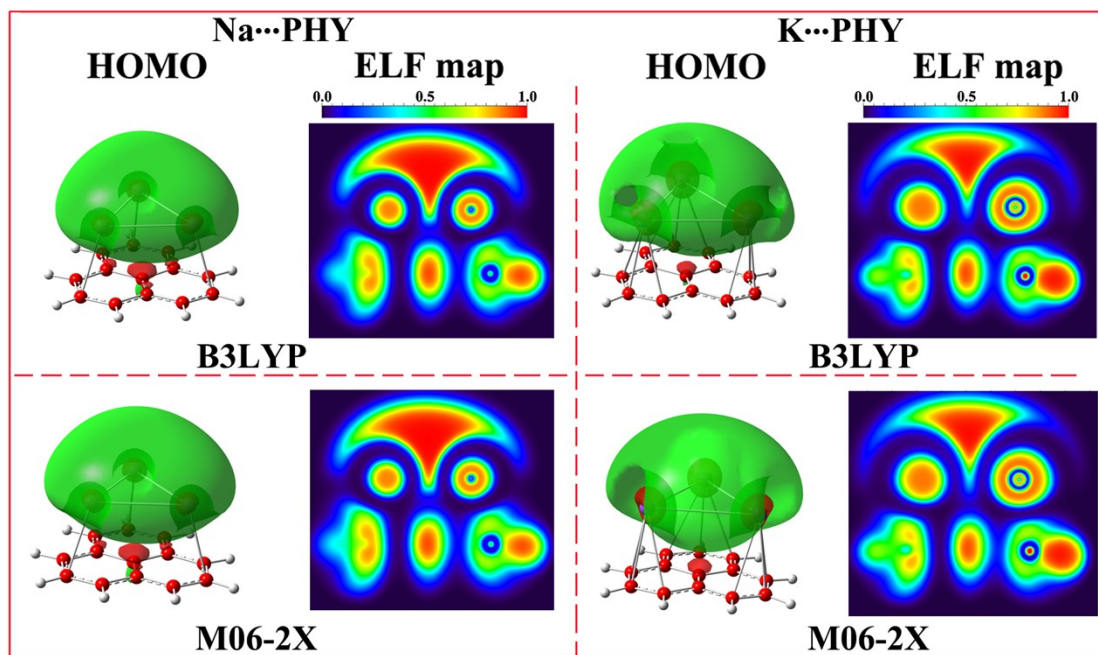

**Fig. S1.** HOMO (isovalue of 0.02 au) and ELF maps of  $e^-\cdots\text{M}_3^+\text{-PHY}$  at different methods with 6-311++G(2d, p) basis set.

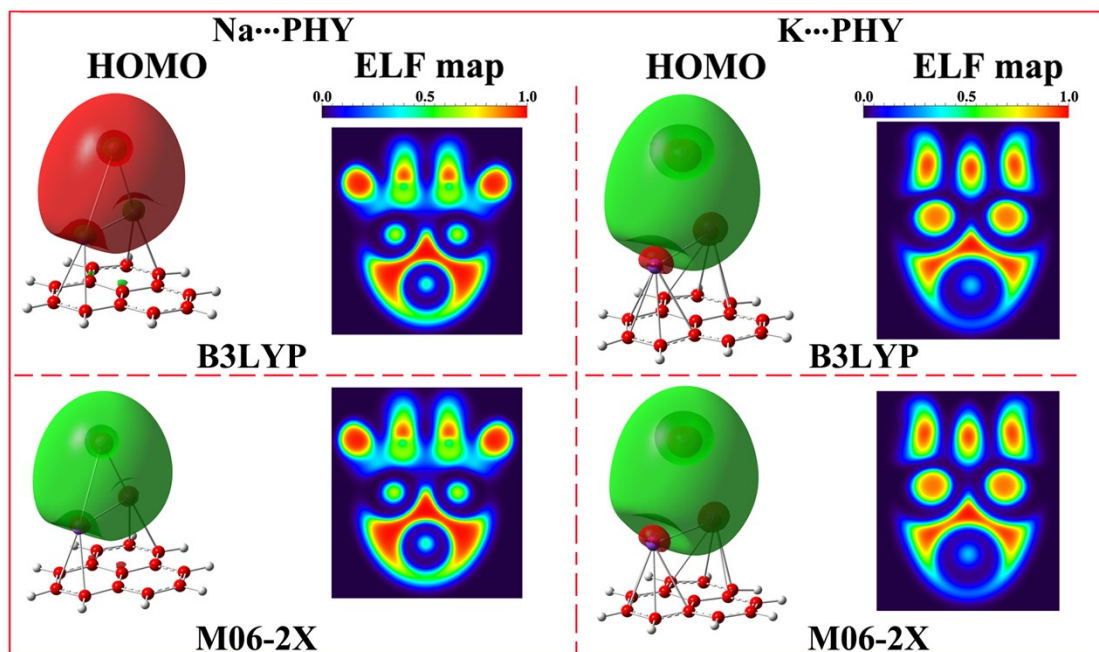

**Fig. S2.** HOMO (isovalue of 0.02 au) and ELF maps of  $\text{Li}^{\delta-}-\text{Li}_2^{(1-\delta)+}-\text{PHY}$  at different methods with 6-311++G(2d, p) basis set.

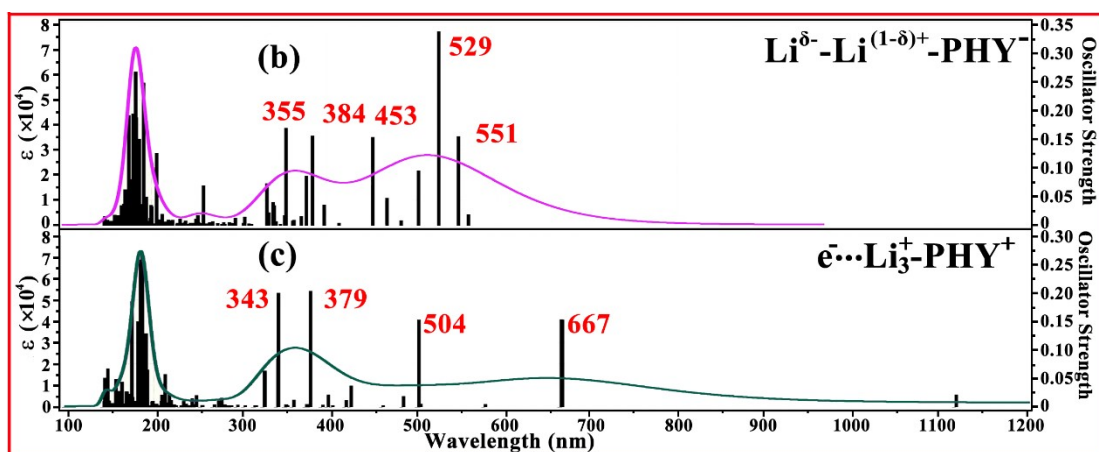

**Fig. S3.** Electronic absorption spectra and crucial excited states of both parallel and T-shaped Li-PHY (isovalue of 0.02 au). a) for  $e^- \cdots \text{Li}_3^+-\text{PHY}^+$  and b) for  $\text{Li}^{\delta^-}-\text{Li}_2^{(1-\delta)^+}-\text{PHY}^-$ .

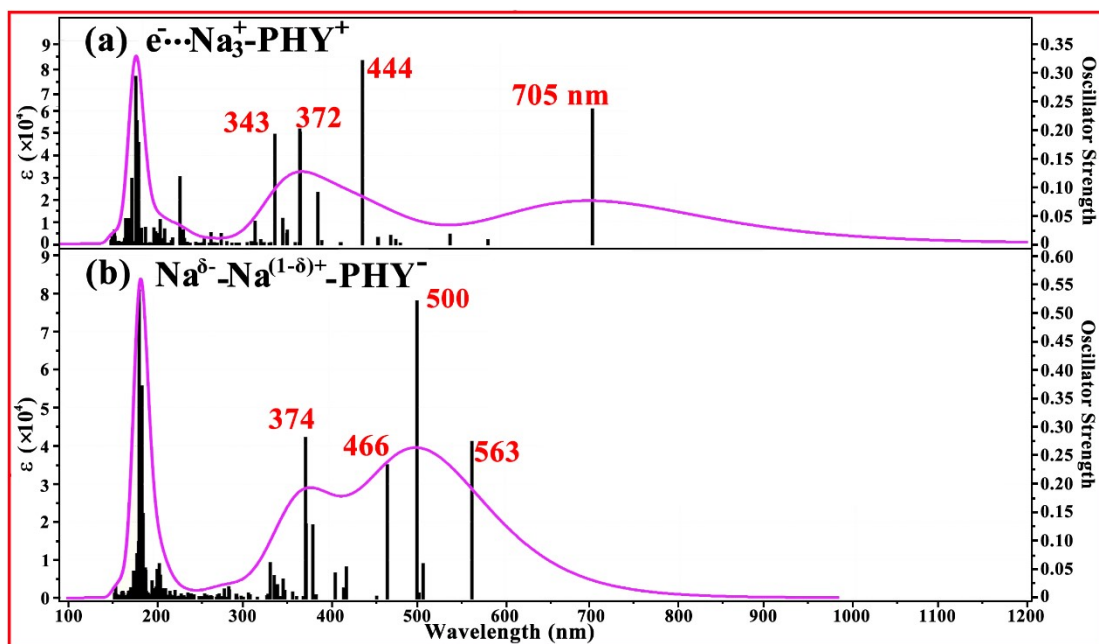

**Fig. S4.** Electronic absorption spectra and crucial excited states of both parallel and T-shaped Li-PHY (isovalue of 0.02 au). a) for  $e^- \cdots Na_3^+ - PHY^+$  and b) for  $Na^{\delta-} - Na^{(1-\delta)+} - PHY^-$ .

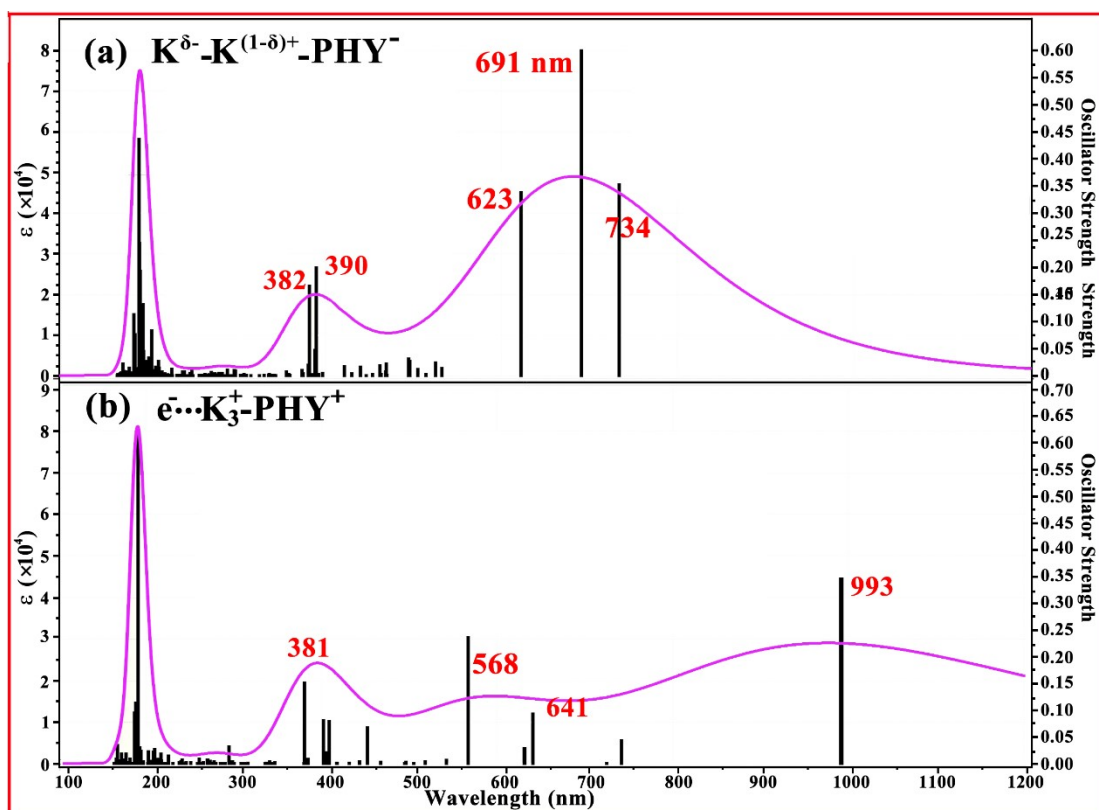

Fig. S5. Electronic absorption spectra and crucial excited states of both parallel and T-shaped Li-PHY (isovalue of 0.02 au).a)for  $e^{-}\cdots K_3^{+}-PHY$  and b) for  $K^{\delta-}-K_2^{(1-\delta)+}-PHY$ .
